# Supplementary material
Source: MDPI journal article supplement (https://www.mdpi.com/2071-1050/14/9/4880)
Supplement: s1 [file s1]

# A Sustainable Approach to the Preparation of MoO<sub>2</sub> Quantum Dots and the Pseudocapacitive Performance before and after Calcination

Yi An <sup>1</sup>, Weizhi Gong <sup>1</sup>, Junli Wang <sup>1,2</sup>, Jianlin Liu <sup>3</sup>, Liexing Zhou <sup>2</sup>, Yi Xia <sup>2</sup>, Cheng Pan <sup>1</sup>, Mingjun Wang <sup>1,2,\*</sup> and Dong Fang <sup>1,\*</sup>

<sup>1</sup> Faculty of Materials Science and Engineering, Kunming University of Science and Technology, Kunming 650093, China; anyi@stu.kust.edu.cn (Y.A.); gongweizhi@stu.kust.edu.cn (W.G.); junliwangli@aliyun.com (J.W.); pancheng@stu.kust.edu.cn (C.P.)

<sup>2</sup> Analytic and Testing Research Center of Yunnan, Kunming 650093, China; 20110011@kust.edu.cn (L.Z.); xiayi0125@163.com (Y.X.)

<sup>3</sup> Faculty of Science, Shaoyang University, Shaoyang 422000, China; liujianlin321123@163.com

\* Correspondence: mjwang@kust.edu.cn (M.W.); fangdong@kust.edu.cn (D.F.)

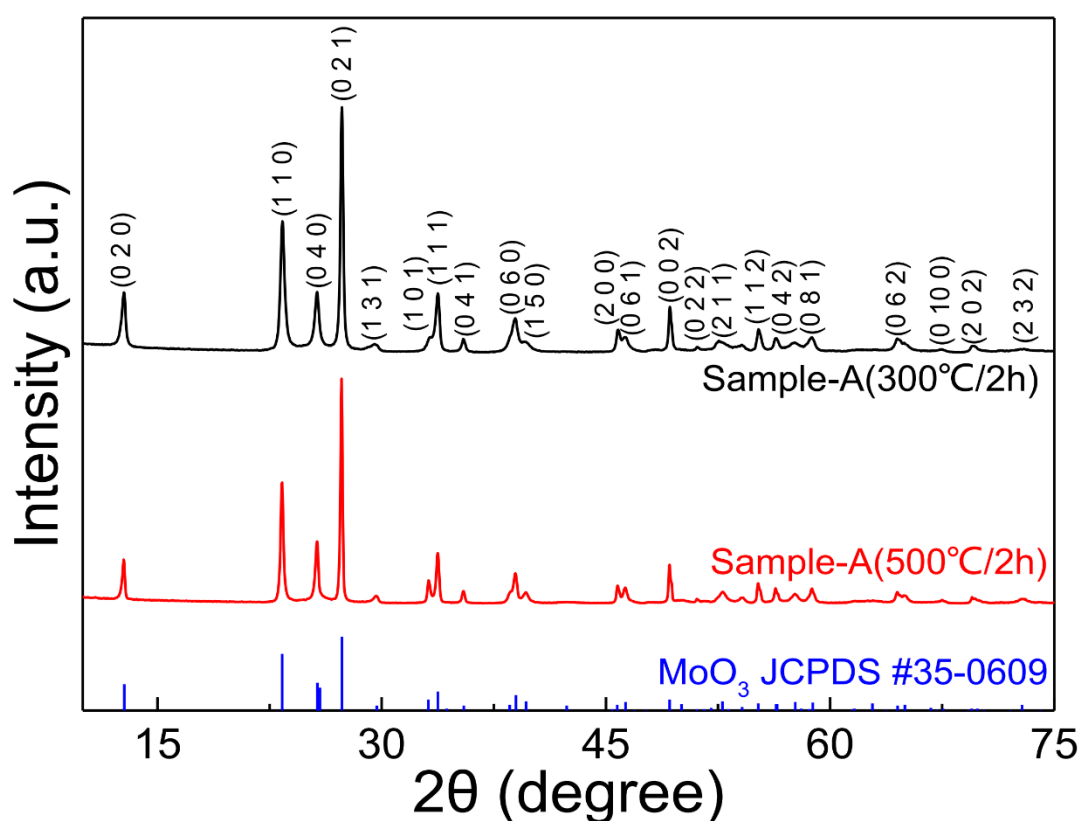

**Figure S1.** XRD patterns of the Sample-A(300 °C/2 h) and Sample-A(500 °C/2 h).

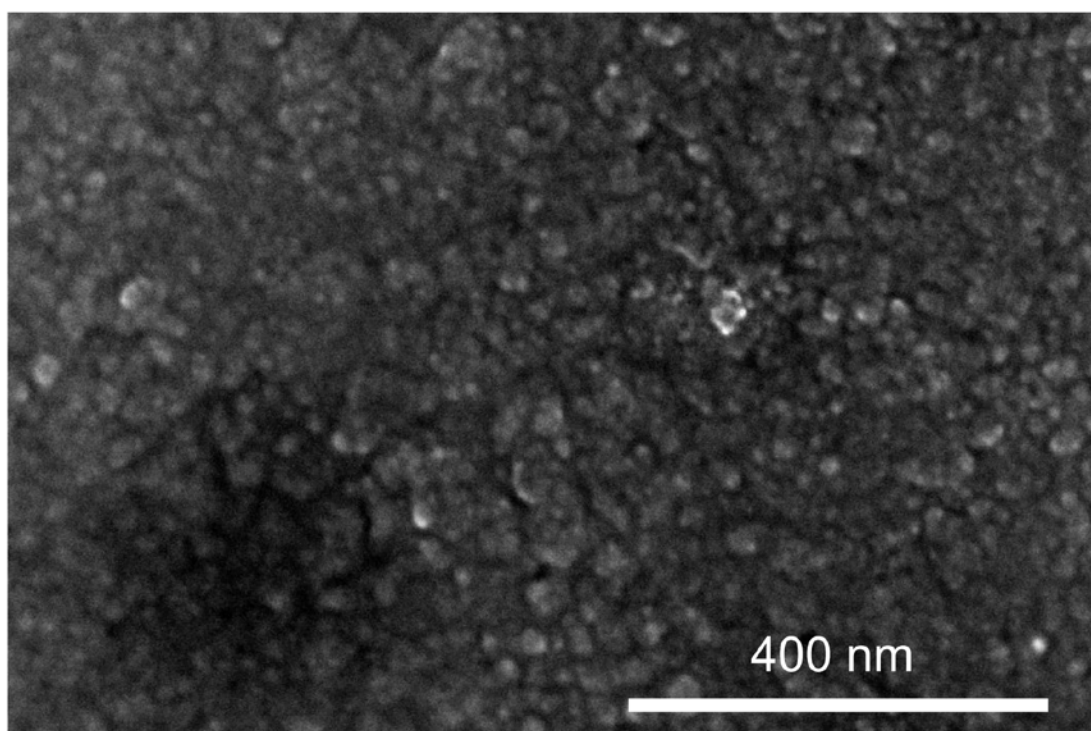

**Figure S2.** FESEM image of the Sample-U.

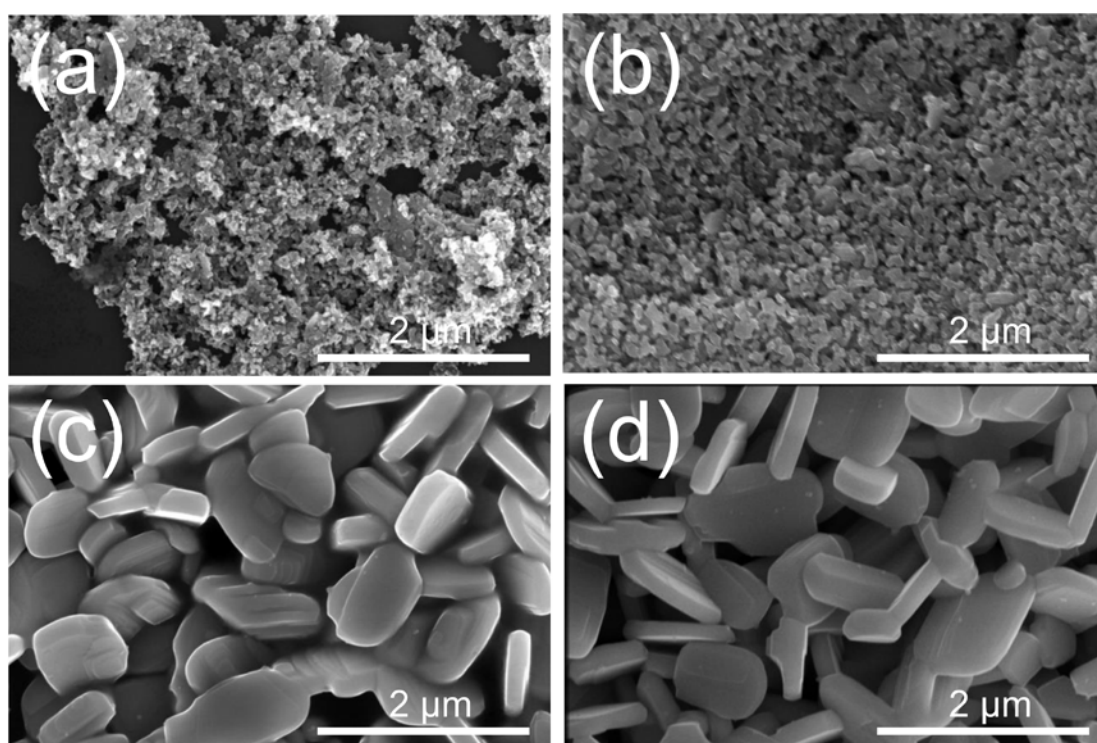

**Figure S3.** FESEM images of the Sample-A(300 °C/1 h) (a), Sample-A(350 °C/1 h) (b), Sample-A(450 °C/1 h) (c) and Sample-A(500 °C/1 h) (d).

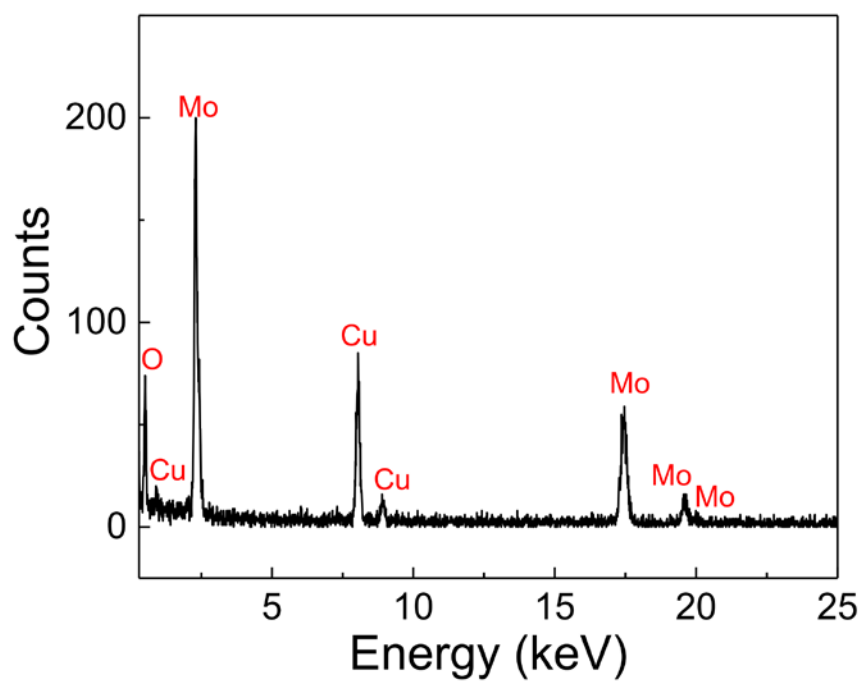

Figure S4. EDS result of the Sample-V.

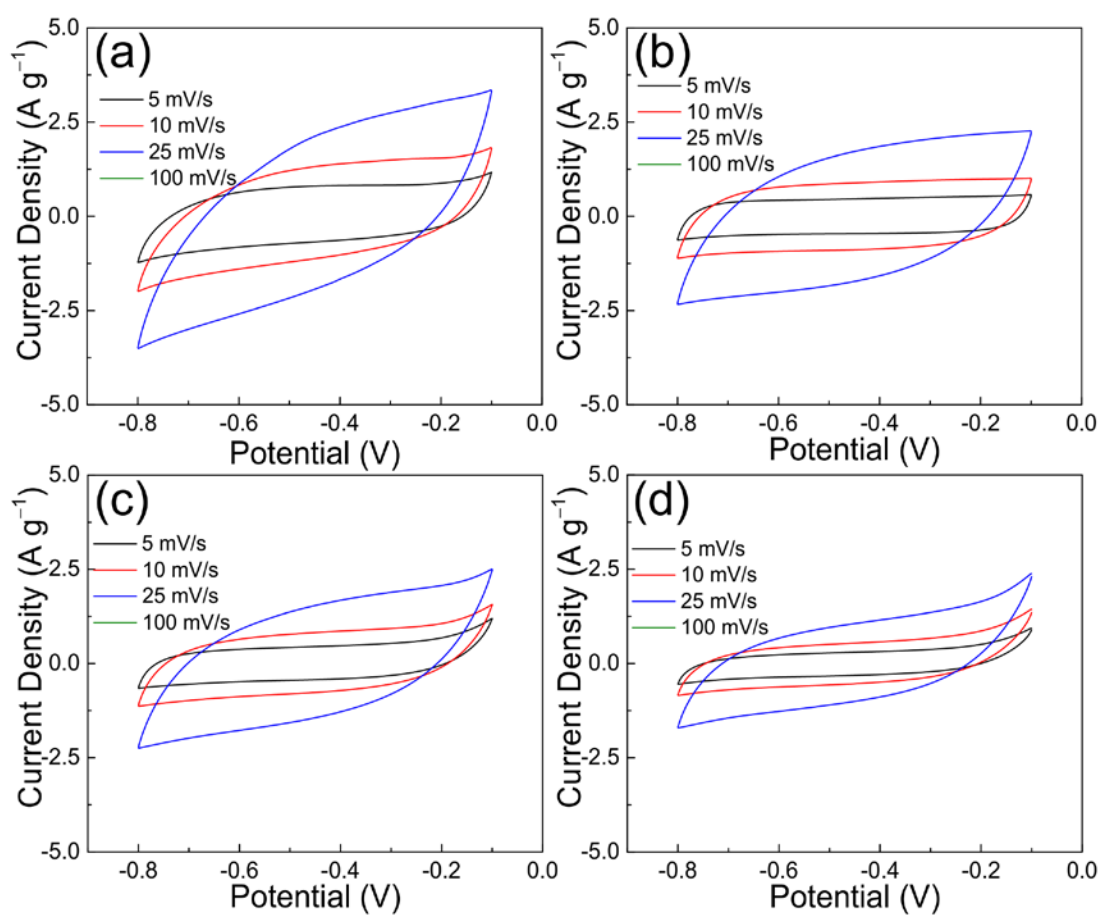

Figure S5. CV curves of the Sample-A(400 °C /2 h) (a), Sample-N (b), Sample-V (c) and Sample-U (d).

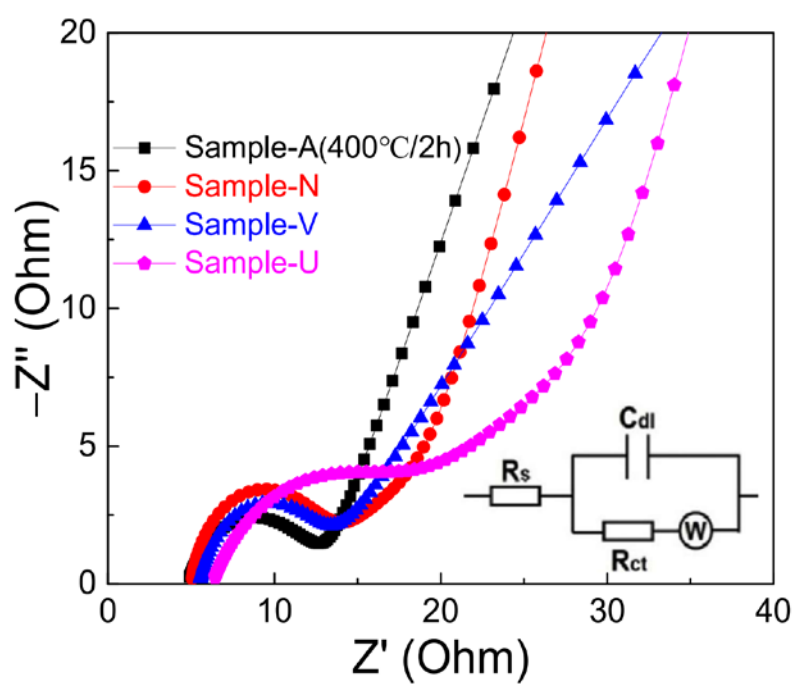

**Figure S6.** Fitting curves of the Nyquist plots of the Sample-U, Sample-A(400 °C/2 h), Sample-N and Sample-V; the inset is the proposed equivalent circuit.
